# Supplementary material for: Human innate immune cell crosstalk induces melanoma cell senescence
Source: PubMed Central journal article supplement — Oncoimmunology. 2020 Aug 30;9(1):1808424. doi: 10.1080/2162402X.2020.1808424 (PMC7470184; doi:10.1080/2162402x.2020.1808424), 2020-08-30
Supplement: KONI_A_1808424_SM4319.pdf [file KONI_A_1808424_SM4319.pdf]

## Supplementary Figure S1

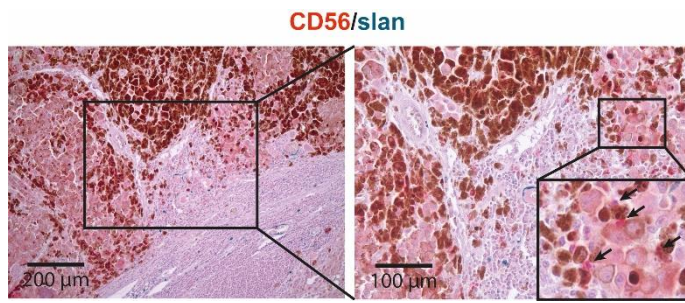

### **NK cells can be distinguished from CD56 positive tumor cells**

CD56 and slan were stained in human FFPE melanoma tissue. Inlet shows CD56 positive NK cells (black arrows) surrounded by CD56 weak positive melanoma cells. Original magnification x100 (left image), x200 (right image).

## Supplementary Figure S2

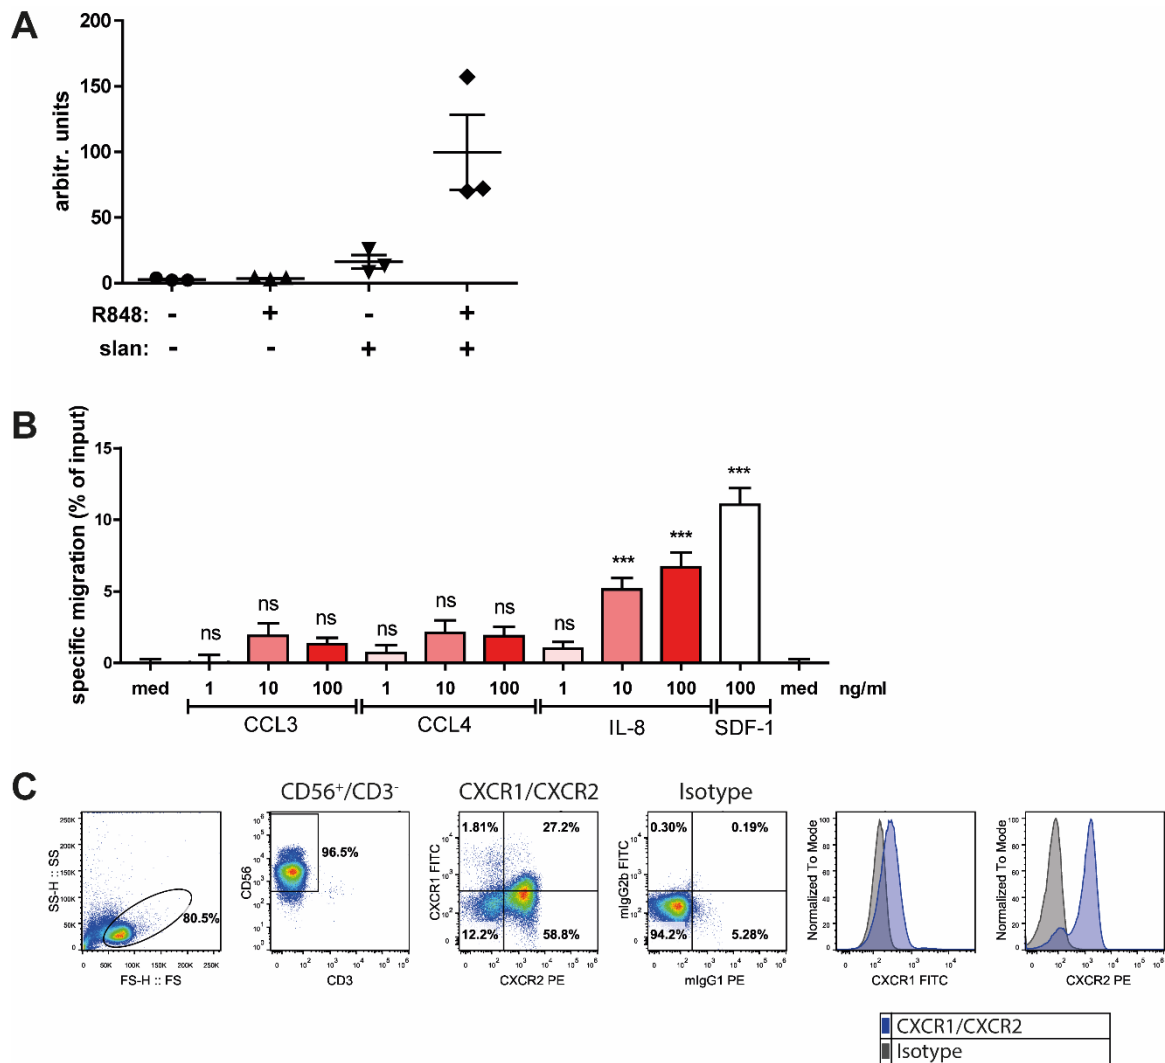

### NK cell migration towards recombinant chemokines present in slanMo supernatants

**A**, Specific migration of 1 day cultured NK cells towards different stimuli including recombinant R848 (1  $\mu\text{g}/\text{ml}$ ) and conditioned medium from unstimulated and R848-activated slanMo displayed as arbitrary units. Data from 3 donors (SEM). **B**, Specific migration of 1 day cultured NK cells towards different stimuli as indicated or control medium (med). Cumulative data from 4 donors. p values were calculated by 1 way Anova comparing each chemokine group with the medium control with \* $p < 0.05$ , \*\* $p < 0.01$ , \*\*\* $p < 0.001$ . **C**, Chemokine receptor expression (CXCR1 and CXCR2) on 1 day cultured NK cells. Pre-gating on CD56<sup>+</sup>CD3<sup>-</sup> NK cells and CXCR1/CXCR2 gating according to isotype staining. Representative data out of 4 donors.

## Supplementary Figure S3

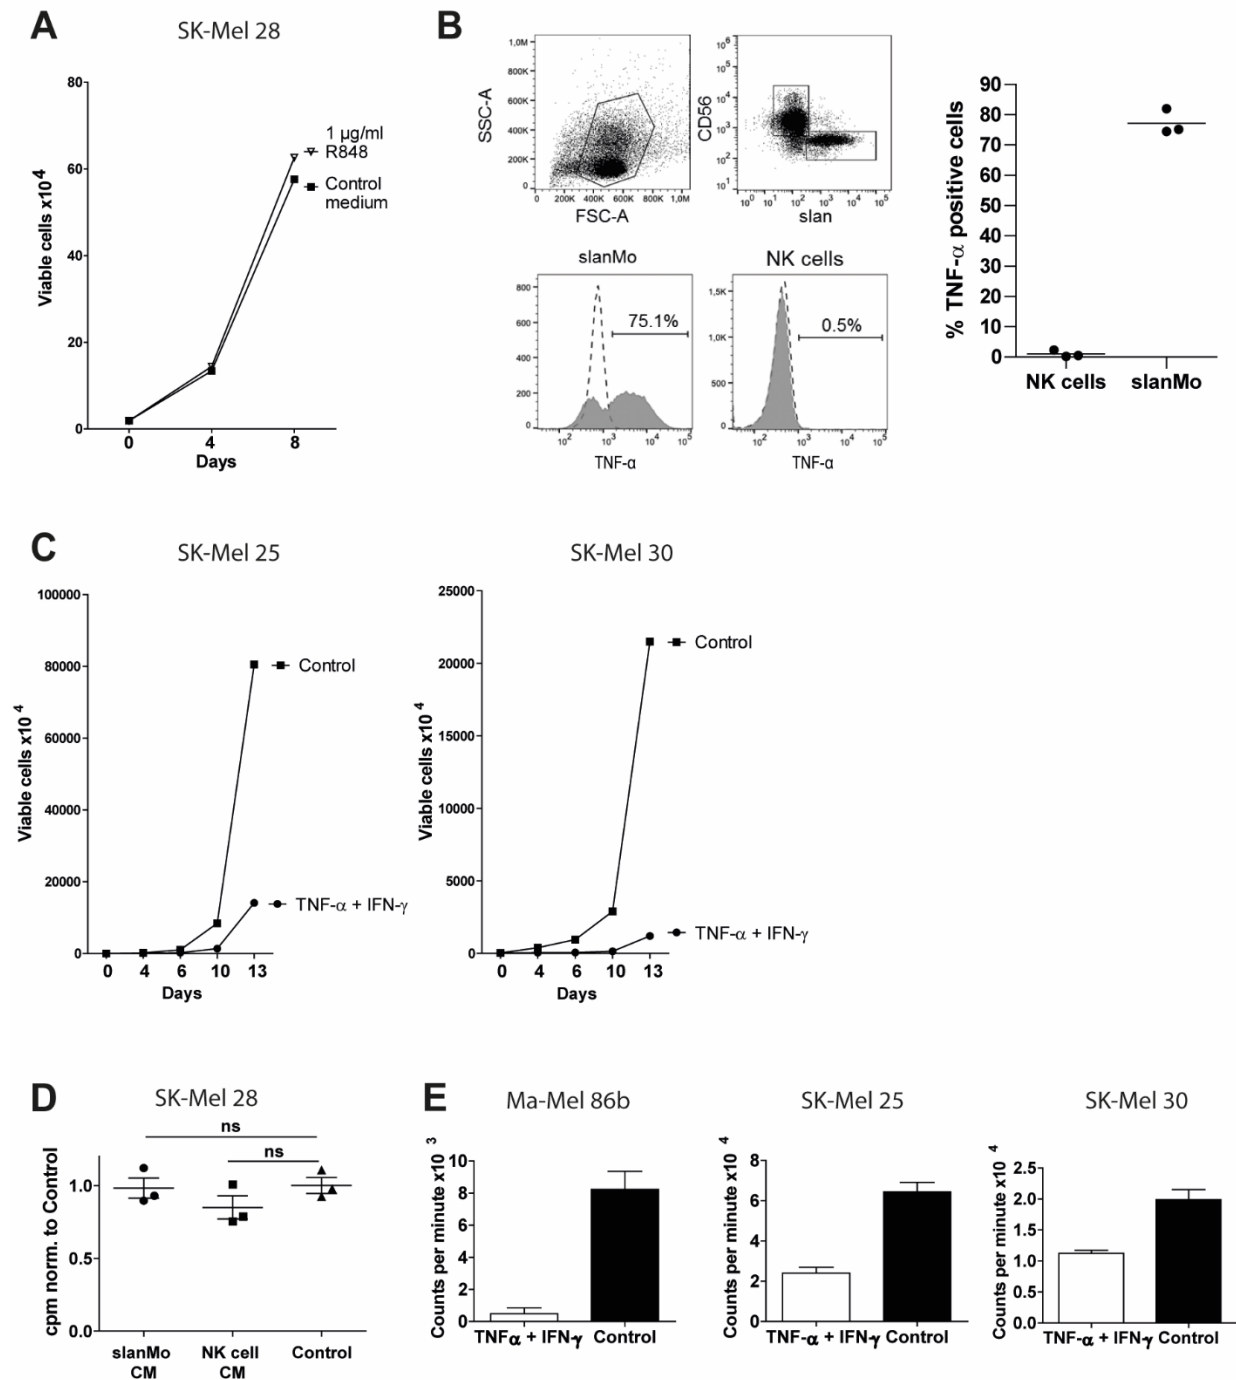

### The TNF- $\alpha$ and IFN- $\gamma$ mediated growth arrest is slanMo/NK cell co-culture dependent

**A**, Prolonged culture of SK-Mel-28 melanoma cells after 4 day treatment with 1  $\mu$ g/ml R848. After the treatment, the cells were washed, counted and cultured in normal medium. **B**, Freshly purified slanMo were cultured for 6 hours before co-culture with NK cells and activation with 1  $\mu$ g/ml R848. After 6 hours of co-culture, the cells were fixed, permeabilized and stained for TNF- $\alpha$  (filled gray) or isotype (dotted line). Representative data out of 3 donors. **C**, Prolonged culture of melanoma cell lines SK-Mel 25 and SK-Mel 30. Melanoma cells were treated for 4 days with recombinant TNF- $\alpha$  and IFN- $\gamma$  (10 ng/ml and 100 ng/ml, respectively). Afterwards, the cells were washed, counted and cultured in normal medium for 3 additional passages. **D**, SK-Mel-28 cells were treated with slanMo and NK cell mono-culture CM. The cells were reseeded and pulsed for 12 h with  $^3$ H-Thymidine for measurement of  $^3$ H-Thymidine incorporation. **E**,  $^3$ H-Thymidine incorporation in melanoma cell lines after treatment with TNF $\alpha$  and IFN- $\gamma$  (10 ng/ml and 100 ng/ml, respectively).

## Supplementary Figure S4

**A**

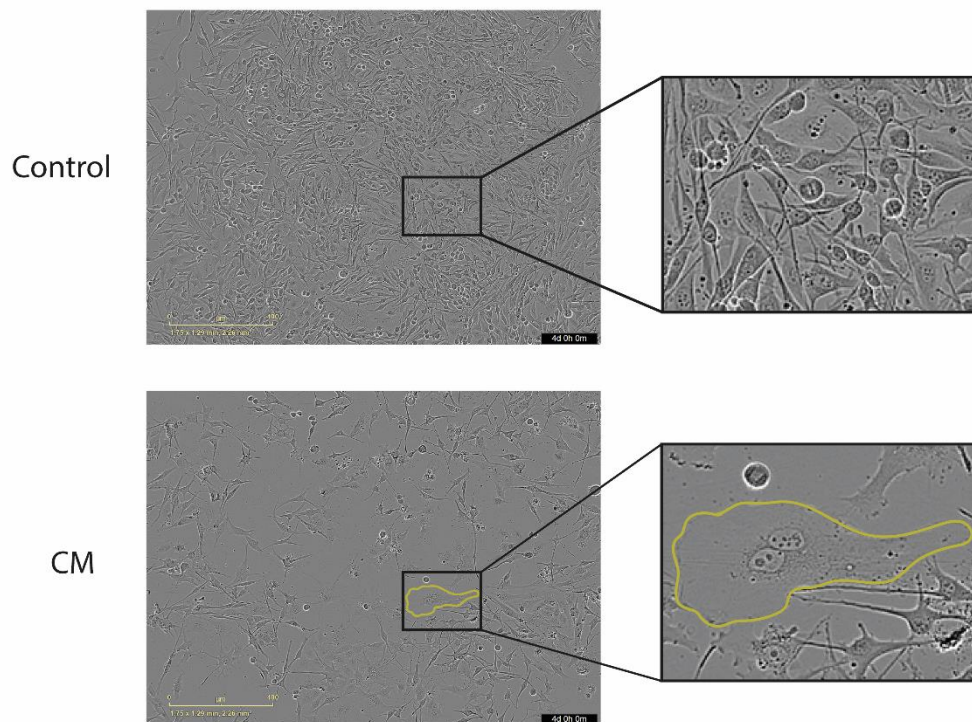

**B**

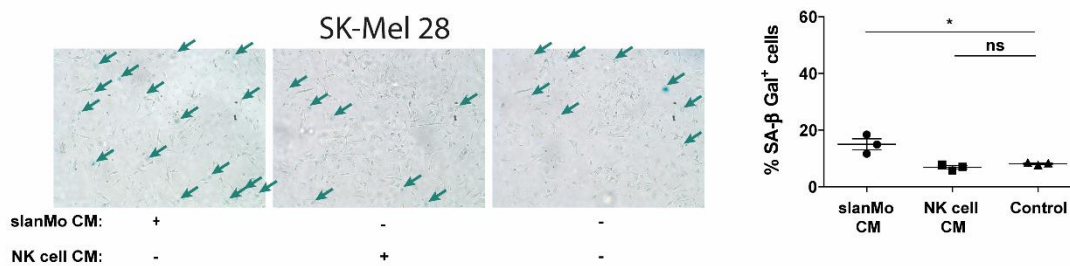

**C**

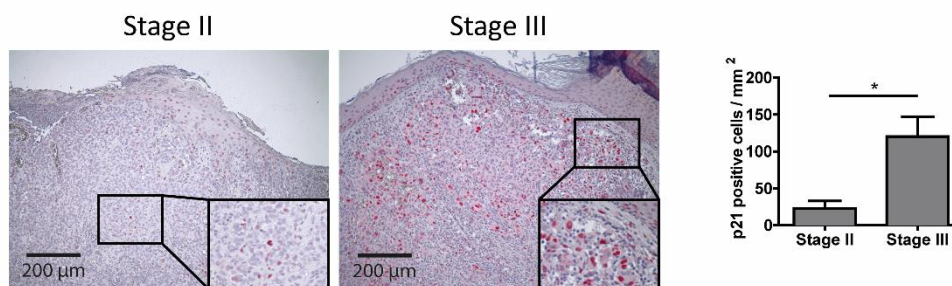

**Co-culture CM treatment results in the formation of morphologically distinct melanoma cells.**

**A**, SK-Mel-28 cells were treated with co-culture CM as described before and 100x magnification images of tumor growth were taken every two hours over a total incubation time of 96 hours. A representative image after 96 hours for each condition is depicted. Yellow line marks cellular margins of a characteristic enlarged and multinucleated (2) cell. **B**, SA-β Galactosidase assay for growth inhibition induced by slnMo and NK cell mono-culture conditioned medium in comparison to control medium. Green arrows indicate representative positive cells. Percentage of SA β-galactosidase positive cells evaluated by staining intensity. **C**, Cutaneous stage II/stage III FFPE melanoma samples were stained for p21 and p21 positive cells were quantified. Numbers for stage II (n=4) and stage III (n=9). Original magnification 100x. Statistical significance was analyzed using Mann-Whitney test with \*p<0.05, \*\*p<0.01, \*\*\*p<0.001.

## Supplementary table 1

### Patient Characteristics

|                         | stage 1<br>(n=10) | stage 2<br>(n=16) | stage 3<br>(n=10) | stage 3 LN<br>(n=10) | stage 4<br>(n=8) |
|-------------------------|-------------------|-------------------|-------------------|----------------------|------------------|
| sex                     |                   |                   |                   |                      |                  |
| female                  | 6 (60%)           | 9 (56%)           | 7 (88%)           | 2 (20%)              | 3 (37.5%)        |
| male                    | 4 (40%)           | 7 (44%)           | 1 (12%)           | 8 (80%)              | 5 (62.5%)        |
| age                     | 60±21             | 61.9±14           | 73.3±12           | 74.7±9.5             | 58.5±8.9         |
| tumor thickness<br>(mm) | 0.6±0.3           | 4.5±2.5           | -                 | -                    | -                |

## Supplementary Table S2

### Primers used for qPCR analysis

|                      |                          |
|----------------------|--------------------------|
| hIL6_fw              | AGACAGCCACTCACCTCTTCAG   |
| hIL6_rev             | TTCTGCCAGTGCCTCTTTGCTG   |
| hIL8_fw              | TTGGCAGCCTTCCTGATTC      |
| hIL8_rev             | TCTTTAGCACTCCTTGGCAAAAC  |
| hIL1A_fw             | TGTATGTGACTGCCCAAGATGAAG |
| hIL1A_rev            | AGAGGAGGTTGGTCTCACTACC   |
| hIL1B_fw             | CCACAGACCTTCCAGGAGAATG   |
| hIL1B_rev            | GTGCAGTTCAGTGATCGTACAGG  |
| hTGF $\beta$ 1_fw    | CGGAGTTGTGCGGCAGTGGT     |
| hTGF $\beta$ 1_rev   | GTTGGTGTCCAGGGCTCGGC     |
| hVEGF-A_fw           | AGTTCATGGATGTCTATCAGCGC  |
| hVEGF-A_rev          | TCCGCATAATCTGCATGGTG     |
| hMMP1_fw             | ATGAAGCAGCCAGATGTGGAG    |
| hMMP1_rev            | TGGTCCACATCTGCTCTTGCCA   |
| hMMP2_fw             | CCACTGCCTTCGATACAC       |
| hMMP2_rev            | GAGCCACTCTCTGGAATCTTAAA  |
| hMMP9_fw             | GCCACTACTGTGCCTTTGAGTC   |
| hMMP9_rev            | CCCTCAGAGAATCGCCAGTACT   |
| hMMP3_fw             | CACTCACAGACCTGACTCGGTT   |
| hMMP3_rev            | AAGCAGGATCACAGTTGGCTGG   |
| hSerpine1_fw = PAI1  | GGCCATTACTACGACATCCTG    |
| hSerpine1_rev = PAI1 | GGTCATGTTGCCTTTCCAGT     |
| hSerpine2_fw = PAI2  | GCTGTTTGGTGAGAAGTCTGCG   |
| hSerpine2_rev = PAI2 | CTGCACATTCTAGGAAGTCTACTG |
| hCXCL1_fw            | AGCCAACGTCAAGCATCTCAA    |
| hCXCL1_rev           | AATCCACTTTAGCTTCGGGTCAA  |
| hCXCL2_fw            | GGCAGAAAGCTTGTCTCAACCC   |
| hCXCL2_rev           | CTCCTTCAGGAACAGCCACCAA   |
| hICAM-1_fw           | AGCGGCTGACGTGTGCAGTAAT   |
| hICAM-1_rev          | TCTGAGACCTCTGGCTTCGTCA   |
| hCCL2_fw             | CCGAGAGGCTGAGACTAAC      |
| hCCL2_rev            | CTTGCTGCTGGTGATTCTTC     |
| hCCL7_fw             | ACAGAAGGACCACCAGTAGCCA   |
| hCCL7_rev            | GGTGCTTCATAAAGTCCTGGACC  |
| hGAPDH_fw            | CGACCACTTTGTCAAGCTCA     |
| hGAPDH_rev           | AGGGGTCTACATGGCAACTG     |

## Supplementary Methods

### Intracellular TNF- $\alpha$ staining

Freshly purified slanMo were plated at a concentration of  $5 \times 10^5$  cells/ml and cultured for 6 hours.  $1 \times 10^6$  NK cells were added and cells were stimulated with 1  $\mu$ g/ml R848 in the presence of 1  $\mu$ g/ml brefeldin A (Sigma-Aldrich). After 6 hours of co-culture, the cells were harvested and stained for slan (clone MDC8) and CD56 (clone B159, BD). For intracellular cytokine staining, cells were fixed with 4% paraformaldehyde (PFA), permeabilized using 1% saponin and stained for TNF- $\alpha$  (clone Mab11, BD) or with the respective isotype control.
